# Supplementary material for: The Potential Impact of Systemic Anti-Inflammatory Therapies on Major Adverse Cardiovascular Events: A Korean Nationwide Cohort Study
Source: Research Square preprint supplement (doi:10.21203/rs.3.rs-115540/v1), 2020-12-07
Supplement: Supplementary file 1 [file 644d75648729a9e1f56c6505.docx]

The potential impact of systemic anti-inflammatory therapies on major adverse cardiovascular events: a Korean nationwide cohort study

Joo Ran Hong, MD, PhD, Hojin Jeong, MS, Hyeongsu Kim, MD, PhD, Hyun Suk Yang, MD, PhD, Ji Youn Hong, MD, Sung Min Kim, MD, Young Ah Cho, MD,Yang Won Lee, MD, PhD, Yong Beom Choe, MD, PhD, and Kyu Joong Ahn, MD, PhD

Supplementary Table 1. International Classification of Diseases (ICD) codes for patients with psoriasis, major cardiovascular outcomes, and baseline comorbidities

| **Disease** | | | **Diagnosis code** |
| --- | --- | --- | --- |
| Psoriasis | | | L40.0, L40.1, L40.4, L40.5, L40.8, L40.9, M07.0, M07.2, M07.3, M09.0 |
| Major adverse cardiovascular event | Coronary arterial disease | |  |
|  | Angina pectoris | I20 |
|  | Myocardial infarction | I21, I22, I23, I24 |
| Cardiac arrest | | I46 |
| Stroke |  |  |
|  | Ischemic stroke | I63 |
|  | Hemorrhagic stroke | I60, I61, I62 |
|  |  | Total stroke | I60, I61, I62, I63, I64 |
| Comorbidities | Hypertension | | I10, I11, I12, I13, I15 |
| Diabetes mellitus | | E10, E11, E12, E13, E14 |
| Dyslipidemia | | E78 |
| End-stage renal diseasea | | N18.0, N18.5 |

aEnd-stage renal disease was claimed under N18.0 before January 1, 2010
